# Supplementary material for: Pan-cancer analysis reveals the associations between MMP13 high expression and carcinogenesis and its value as a serum diagnostic marker
Source: publisher site journal article supplement (doi:10.18632/aging.204599), 2023-03-22
Supplement: Supplementary file [file aging-v15i6-204599-supplementary-material-SD1.pdf]

SUPPLEMENTARY FIGURE

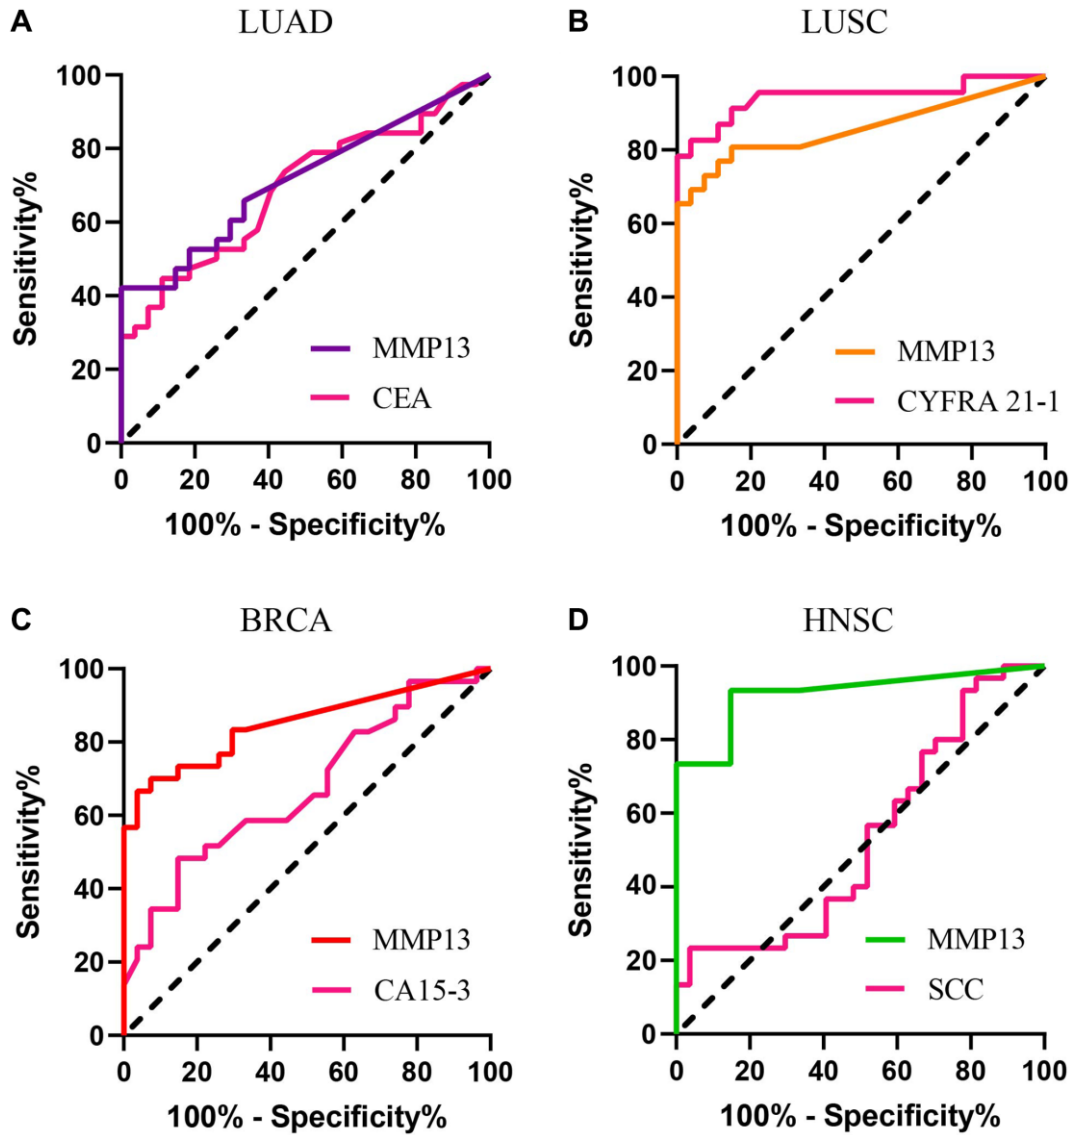

**Supplementary Figure 1. The diagnostic value of MMP13 was compared with other clinical biomarkers. (A)** Comparison of diagnostic efficacy of MMP13 and CEA in LUAD. **(B)** Comparison of diagnostic efficacy of MMP13 and CYFRA 21-1 in LUSC. **(C)** Comparison of diagnostic efficacy of MMP13 and CA15-3 in BRCA. **(D)** Comparison of diagnostic efficacy of MMP13 and SCC in HNSC.
